CORRECTION

## Correction: Modelling African horse sickness emergence and transmission in the South African control area using a deterministic metapopulation approach

Joanna N. de Klerk, Erin E. Gorsich, John D. Grewar, Benjamin D. Atkins, Warren S. D. Tennant, Karien Labuschagne, Michael J. Tildesley

### Notice of Republication

This article was republished on July 29, 2025, to correct errors in the data availability statement. Please download this article again to view the correct version. The originally published, uncorrected article and the republished, corrected articles are provided here for reference.

### Supporting information

**S1 File. Originally published, uncorrected article.**

(PDF)

**S2 File. Republished, corrected article.**

(PDF)

### Reference

1. de Klerk JN, Gorsich EE, Grewar JD, Atkins BD, Tennant WSD, Labuschagne K, et al. Modelling African horse sickness emergence and transmission in the South African control area using a deterministic metapopulation approach. *PLoS Comput Biol*. 2023;19(9):e1011448. <https://doi.org/10.1371/journal.pcbi.1011448> PMID: [37672554](https://pubmed.ncbi.nlm.nih.gov/37672554/)

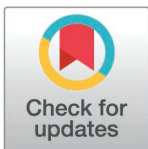

### OPEN ACCESS

**Citation:** de Klerk JN, Gorsich EE, Grewar JD, Atkins BD, Tennant WSD, Labuschagne K, et al. (2025) Correction: Modelling African horse sickness emergence and transmission in the South African control area using a deterministic metapopulation approach. *PLoS Comput Biol* 21(8): e1013377. <https://doi.org/10.1371/journal.pcbi.1013377>

**Published:** August 12, 2025

**Copyright:** © 2025 de Klerk et al. This is an open access article distributed under the terms of the [Creative Commons Attribution License](https://creativecommons.org/licenses/by/4.0/), which permits unrestricted use, distribution, and reproduction in any medium, provided the original author and source are credited.
